# Supplementary material
Source: publisher figshare collection journal article supplement (https://acs.figshare.com/ndownloader/files/6979385)
Supplement: Supplementary file 1 [file 6979385]

 
data_jrb2074 
  
_audit_creation_method            SHELXL-97 
_chemical_name_systematic 
; 
 ? 
; 
_chemical_name_common             ? 
_chemical_melting_point           ? 
_chemical_formula_moiety          'C13 H13 B F6 N7 Ni' 
_chemical_formula_sum 
 'C13 H13 B F6 N7 Ni' 
_chemical_formula_weight          450.82 
  
loop_ 
 _atom_type_symbol 
 _atom_type_description 
 _atom_type_scat_dispersion_real 
 _atom_type_scat_dispersion_imag 
 _atom_type_scat_source 
 'C'  'C'   0.0181   0.0091 
 'International Tables Vol C Tables 4.2.6.8 and 6.1.1.4' 
 'H'  'H'   0.0000   0.0000 
 'International Tables Vol C Tables 4.2.6.8 and 6.1.1.4' 
 'B'  'B'   0.0090   0.0039 
 'International Tables Vol C Tables 4.2.6.8 and 6.1.1.4' 
 'N'  'N'   0.0311   0.0180 
 'International Tables Vol C Tables 4.2.6.8 and 6.1.1.4' 
 'F'  'F'   0.0727   0.0534 
 'International Tables Vol C Tables 4.2.6.8 and 6.1.1.4' 
 'Ni'  'Ni'  -3.0029   0.5091 
 'International Tables Vol C Tables 4.2.6.8 and 6.1.1.4' 
  
_symmetry_cell_setting            orthorhombic 
_symmetry_space_group_name_H-M    Pna2(1)
  
loop_ 
 _symmetry_equiv_pos_as_xyz 
 'x, y, z' 
 '-x, -y, z+1/2' 
 'x+1/2, -y+1/2, z' 
 '-x+1/2, y+1/2, z+1/2' 
  
_cell_length_a                    17.0516(12) 
_cell_length_b                    7.53680(10) 
_cell_length_c                    13.2536(2) 
_cell_angle_alpha                 90.00 
_cell_angle_beta                  90.00 
_cell_angle_gamma                 90.00 
_cell_volume                      1703.28(12) 
_cell_formula_units_Z             4 
_cell_measurement_temperature     85(2) 
_cell_measurement_reflns_used     16173 
_cell_measurement_theta_min       2.60 
_cell_measurement_theta_max       68.20 
  
_exptl_crystal_description        plate 
_exptl_crystal_colour             purple 
_exptl_crystal_size_max           0.20 
_exptl_crystal_size_mid           0.14 
_exptl_crystal_size_min           0.12 
_exptl_crystal_density_meas       ? 
_exptl_crystal_density_diffrn     1.758 
_exptl_crystal_density_method     'not measured' 
_exptl_crystal_F_000              908 
_exptl_absorpt_coefficient_mu     2.390 
_exptl_absorpt_correction_type    multi-scan 
_exptl_absorpt_correction_T_min   0.6464 
_exptl_absorpt_correction_T_max   0.7624 
_exptl_absorpt_process_details 
; 
    Higashi, T. (1995). Program for Absorption Correction. 
    Rigaku Corporation, Tokyo, Japan. 
; 
  
  
_exptl_special_details 
; 
 2028 images x 1 sec. / 6 sec. @ 42.00mm; 1.0 deg omega scans; 40kV/30mA 
; 
  
_diffrn_ambient_temperature       85(2) 
_diffrn_radiation_wavelength      1.54178 
_diffrn_radiation_type            CuK\a 
_diffrn_radiation_source          'micro-focus rotating anode' 
_diffrn_radiation_monochromator   confocal 
_diffrn_measurement_device_type   'Rigaku Saturn944+ CCD' 
_diffrn_measurement_method        \w 
_diffrn_detector_area_resol_mean  29.257 
_diffrn_reflns_number             24861 
_diffrn_reflns_av_R_equivalents   0.0466 
_diffrn_reflns_av_sigmaI/netI     0.0322 
_diffrn_reflns_limit_h_min        -20 
_diffrn_reflns_limit_h_max        20 
_diffrn_reflns_limit_k_min        -9 
_diffrn_reflns_limit_k_max        9 
_diffrn_reflns_limit_l_min        -15 
_diffrn_reflns_limit_l_max        15 
_diffrn_reflns_theta_min          5.19 
_diffrn_reflns_theta_max          68.23 
_reflns_number_total              3099 
_reflns_number_gt                 3064 
_reflns_threshold_expression      >2sigma(I) 
  
_computing_data_collection        'CrystalClear-SM Expert 2.0 r16 (Rigaku, 2014)' 
_computing_cell_refinement        'CrystalClear-SM Expert 2.0 r16' 
_computing_data_reduction         'CrystalClear-SM Expert 2.0 r16' 
_computing_structure_solution     'SHELXS-97 (Sheldrick, 2008)' 
_computing_structure_refinement   'SHELXL-97 (Sheldrick, 2008)' 
_computing_molecular_graphics     'Bruker SHELXTL' 
_computing_publication_material   'Bruker SHELXTL' 
  
_refine_special_details 
; 
 Refinement of F^2^ against ALL reflections.  The weighted R-factor wR and 
 goodness of fit S are based on F^2^, conventional R-factors R are based 
 on F, with F set to zero for negative F^2^. The threshold expression of 
 F^2^ > 2sigma(F^2^) is used only for calculating R-factors(gt) etc. and is 
 not relevant to the choice of reflections for refinement.  R-factors based 
 on F^2^ are statistically about twice as large as those based on F, and R- 
 factors based on ALL data will be even larger. 
; 
  
_refine_ls_structure_factor_coef  Fsqd 
_refine_ls_matrix_type            full 
_refine_ls_weighting_scheme       calc 
_refine_ls_weighting_details 
 'calc w=1/[\s^2^(Fo^2^)+(0.0190P)^2^+1.1748P] where P=(Fo^2^+2Fc^2^)/3' 
_atom_sites_solution_primary      direct 
_atom_sites_solution_secondary    difmap 
_atom_sites_solution_hydrogens    geom 
_refine_ls_hydrogen_treatment     mixed 
_refine_ls_extinction_method      SHELXL 
_refine_ls_extinction_coef        0.00110(13) 
_refine_ls_extinction_expression 
 'Fc^*^=kFc[1+0.001xFc^2^\l^3^/sin(2\q)]^-1/4^' 
_refine_ls_abs_structure_details 
 'Flack H D (1983), Acta Cryst. A39, 876-881' 
_refine_ls_abs_structure_Flack    0.00(2) 
_refine_ls_number_reflns          3099 
_refine_ls_number_parameters      259 
_refine_ls_number_restraints      1 
_refine_ls_R_factor_all           0.0266 
_refine_ls_R_factor_gt            0.0263 
_refine_ls_wR_factor_ref          0.0638 
_refine_ls_wR_factor_gt           0.0636 
_refine_ls_goodness_of_fit_ref    1.183 
_refine_ls_restrained_S_all       1.183 
_refine_ls_shift/su_max           0.001 
_refine_ls_shift/su_mean          0.000 
  
loop_ 
 _atom_site_label 
 _atom_site_type_symbol 
 _atom_site_fract_x 
 _atom_site_fract_y 
 _atom_site_fract_z 
 _atom_site_U_iso_or_equiv 
 _atom_site_adp_type 
 _atom_site_occupancy 
 _atom_site_symmetry_multiplicity 
 _atom_site_calc_flag 
 _atom_site_refinement_flags 
 _atom_site_disorder_assembly 
 _atom_site_disorder_group 
Ni1 Ni 0.378112(19) 0.55262(4) 0.52207(3) 0.01019(10) Uani 1 1 d . . . 
F1 F 0.42780(8) 0.62502(19) 0.72235(10) 0.0188(3) Uani 1 1 d . . . 
F2 F 0.39869(9) 0.85580(19) 0.63591(12) 0.0229(3) Uani 1 1 d . . . 
F3 F 0.50790(8) 0.7227(2) 0.60977(11) 0.0236(3) Uani 1 1 d . . . 
F4 F 0.43893(8) 0.21357(17) 0.51490(13) 0.0228(3) Uani 1 1 d . . . 
F5 F 0.52079(8) 0.4122(2) 0.46409(13) 0.0244(3) Uani 1 1 d . . . 
F6 F 0.50199(9) 0.3678(2) 0.62320(12) 0.0261(3) Uani 1 1 d . . . 
N1 N 0.33710(11) 0.4185(3) 0.40447(15) 0.0122(4) Uani 1 1 d . . . 
N2 N 0.26069(11) 0.3666(2) 0.40380(15) 0.0120(4) Uani 1 1 d . . . 
N3 N 0.23513(11) 0.3582(3) 0.58936(15) 0.0119(4) Uani 1 1 d . . . 
N4 N 0.30946(11) 0.3990(3) 0.62132(15) 0.0123(4) Uani 1 1 d . . . 
N5 N 0.21262(10) 0.6344(2) 0.49290(14) 0.0111(4) Uani 1 1 d . . . 
N6 N 0.28433(10) 0.7140(2) 0.50783(14) 0.0121(4) Uani 1 1 d . . . 
N7 N 0.43660(12) 0.7262(3) 0.41266(16) 0.0165(4) Uani 1 1 d . . . 
C1 C 0.36915(14) 0.3647(3) 0.31725(18) 0.0159(5) Uani 1 1 d . . . 
H1 H 0.4219 0.3849 0.2974 0.019 Uiso 1 1 calc R . . 
C2 C 0.31306(15) 0.2746(3) 0.26024(18) 0.0183(5) Uani 1 1 d . . . 
H2 H 0.3201 0.2212 0.1959 0.022 Uiso 1 1 calc R . . 
C3 C 0.24541(15) 0.2793(3) 0.31684(18) 0.0166(5) Uani 1 1 d . . . 
H3 H 0.1963 0.2296 0.2980 0.020 Uiso 1 1 calc R . . 
C4 C 0.19824(14) 0.2621(3) 0.66150(18) 0.0148(5) Uani 1 1 d . . . 
H4 H 0.1462 0.2178 0.6578 0.018 Uiso 1 1 calc R . . 
C5 C 0.24894(16) 0.2398(4) 0.7409(2) 0.0194(5) Uani 1 1 d . . . 
H5 H 0.2393 0.1784 0.8022 0.023 Uiso 1 1 calc R . . 
C6 C 0.31802(15) 0.3271(3) 0.71218(18) 0.0166(5) Uani 1 1 d . . . 
H6 H 0.3643 0.3338 0.7519 0.020 Uiso 1 1 calc R . . 
C7 C 0.15777(13) 0.7599(3) 0.47823(18) 0.0143(4) Uani 1 1 d . . . 
H7 H 0.1035 0.7388 0.4669 0.017 Uiso 1 1 calc R . . 
C8 C 0.19332(14) 0.9249(3) 0.48239(18) 0.0162(5) Uani 1 1 d . . . 
H8 H 0.1693 1.0378 0.4742 0.019 Uiso 1 1 calc R . . 
C9 C 0.27214(14) 0.8888(3) 0.50119(16) 0.0151(5) Uani 1 1 d . . . 
H9 H 0.3118 0.9765 0.5083 0.018 Uiso 1 1 calc R . . 
C10 C 0.43041(13) 0.6923(3) 0.62690(19) 0.0143(5) Uani 1 1 d . . . 
C11 C 0.46431(13) 0.3816(3) 0.53362(19) 0.0165(5) Uani 1 1 d . . . 
C12 C 0.45990(14) 0.8324(3) 0.35957(19) 0.0163(5) Uani 1 1 d . . . 
C13 C 0.49063(17) 0.9673(3) 0.2922(2) 0.0270(6) Uani 1 1 d . . . 
H13A H 0.5128 1.0648 0.3319 0.040 Uiso 1 1 calc R . . 
H13B H 0.4482 1.0126 0.2495 0.040 Uiso 1 1 calc R . . 
H13C H 0.5317 0.9155 0.2496 0.040 Uiso 1 1 calc R . . 
B1 B 0.20596(15) 0.4311(3) 0.48884(19) 0.0115(5) Uani 1 1 d . . . 
H1A H 0.1446(17) 0.393(4) 0.472(2) 0.018(7) Uiso 1 1 d . . . 
  
loop_ 
 _atom_site_aniso_label 
 _atom_site_aniso_U_11 
 _atom_site_aniso_U_22 
 _atom_site_aniso_U_33 
 _atom_site_aniso_U_23 
 _atom_site_aniso_U_13 
 _atom_site_aniso_U_12 
Ni1 0.00890(17) 0.01286(17) 0.00882(17) 0.00073(16) -0.00018(16) -0.00061(13) 
F1 0.0178(7) 0.0278(7) 0.0107(6) 0.0001(6) -0.0019(5) -0.0028(6) 
F2 0.0281(7) 0.0167(7) 0.0239(8) -0.0058(6) -0.0080(6) -0.0014(6) 
F3 0.0129(7) 0.0392(9) 0.0186(8) -0.0033(6) 0.0023(5) -0.0101(6) 
F4 0.0236(7) 0.0152(6) 0.0298(8) 0.0038(7) -0.0027(7) 0.0032(5) 
F5 0.0146(7) 0.0289(7) 0.0298(9) 0.0017(7) 0.0091(6) 0.0043(6) 
F6 0.0241(7) 0.0332(8) 0.0211(8) -0.0003(7) -0.0107(6) 0.0111(7) 
N1 0.0107(9) 0.0141(9) 0.0119(10) 0.0010(7) 0.0002(8) 0.0001(7) 
N2 0.0121(9) 0.0125(9) 0.0115(10) -0.0002(8) -0.0001(8) -0.0020(7) 
N3 0.0117(9) 0.0141(9) 0.0097(9) 0.0011(7) -0.0002(7) -0.0039(8) 
N4 0.0093(9) 0.0162(9) 0.0115(9) 0.0013(8) -0.0011(8) 0.0005(7) 
N5 0.0073(8) 0.0138(9) 0.0122(9) -0.0011(7) -0.0002(7) -0.0005(7) 
N6 0.0108(8) 0.0123(8) 0.0131(10) -0.0012(7) 0.0000(7) -0.0038(7) 
N7 0.0142(10) 0.0202(11) 0.0151(10) 0.0018(9) 0.0019(8) -0.0028(8) 
C1 0.0201(11) 0.0169(11) 0.0107(11) -0.0004(9) 0.0035(9) 0.0029(9) 
C2 0.0252(13) 0.0184(12) 0.0113(11) -0.0045(9) -0.0041(9) 0.0036(10) 
C3 0.0215(12) 0.0174(12) 0.0108(12) -0.0037(9) -0.0062(9) -0.0028(9) 
C4 0.0151(11) 0.0144(11) 0.0150(11) 0.0018(9) 0.0042(9) -0.0062(9) 
C5 0.0238(13) 0.0223(12) 0.0122(12) 0.0023(10) 0.0029(9) -0.0045(10) 
C6 0.0197(12) 0.0186(12) 0.0114(12) 0.0021(9) -0.0012(9) -0.0020(10) 
C7 0.0102(10) 0.0206(11) 0.0120(10) -0.0003(9) 0.0001(9) 0.0044(9) 
C8 0.0187(12) 0.0157(11) 0.0144(10) -0.0005(9) 0.0005(9) 0.0039(9) 
C9 0.0165(11) 0.0139(10) 0.0149(13) -0.0022(8) -0.0001(8) 0.0006(8) 
C10 0.0098(10) 0.0214(12) 0.0117(11) 0.0032(10) -0.0015(9) -0.0026(9) 
C11 0.0154(10) 0.0205(11) 0.0135(12) 0.0012(10) 0.0012(10) 0.0000(8) 
C12 0.0128(11) 0.0192(12) 0.0169(12) -0.0007(10) -0.0011(9) 0.0028(10) 
C13 0.0346(15) 0.0181(13) 0.0282(16) 0.0080(11) 0.0120(12) 0.0004(11) 
B1 0.0098(11) 0.0135(12) 0.0114(12) -0.0010(9) -0.0002(9) -0.0032(9) 
  
_geom_special_details 
; 
 All esds (except the esd in the dihedral angle between two l.s. planes) 
 are estimated using the full covariance matrix.  The cell esds are taken 
 into account individually in the estimation of esds in distances, angles 
 and torsion angles; correlations between esds in cell parameters are only 
 used when they are defined by crystal symmetry.  An approximate (isotropic) 
 treatment of cell esds is used for estimating esds involving l.s. planes. 
; 
  
loop_ 
 _geom_bond_atom_site_label_1 
 _geom_bond_atom_site_label_2 
 _geom_bond_distance 
 _geom_bond_site_symmetry_2 
 _geom_bond_publ_flag 
Ni1 C10 1.958(3) . ? 
Ni1 C11 1.961(2) . ? 
Ni1 N1 1.985(2) . ? 
Ni1 N6 2.0179(18) . ? 
Ni1 N4 2.107(2) . ? 
Ni1 N7 2.193(2) . ? 
F1 C10 1.364(3) . ? 
F2 C10 1.351(3) . ? 
F3 C10 1.360(3) . ? 
F4 C11 1.361(3) . ? 
F5 C11 1.353(3) . ? 
F6 C11 1.354(3) . ? 
N1 C1 1.341(3) . ? 
N1 N2 1.360(3) . ? 
N2 C3 1.353(3) . ? 
N2 B1 1.542(3) . ? 
N3 C4 1.354(3) . ? 
N3 N4 1.371(3) . ? 
N3 B1 1.525(3) . ? 
N4 C6 1.329(3) . ? 
N5 C7 1.344(3) . ? 
N5 N6 1.376(2) . ? 
N5 B1 1.537(3) . ? 
N6 C9 1.337(3) . ? 
N7 C12 1.137(3) . ? 
C1 C2 1.395(4) . ? 
C1 H1 0.9500 . ? 
C2 C3 1.376(4) . ? 
C2 H2 0.9500 . ? 
C3 H3 0.9500 . ? 
C4 C5 1.372(4) . ? 
C4 H4 0.9500 . ? 
C5 C6 1.402(4) . ? 
C5 H5 0.9500 . ? 
C6 H6 0.9500 . ? 
C7 C8 1.385(3) . ? 
C7 H7 0.9500 . ? 
C8 C9 1.394(3) . ? 
C8 H8 0.9500 . ? 
C9 H9 0.9500 . ? 
C12 C13 1.451(3) . ? 
C13 H13A 0.9800 . ? 
C13 H13B 0.9800 . ? 
C13 H13C 0.9800 . ? 
B1 H1A 1.11(3) . ? 
  
loop_ 
 _geom_angle_atom_site_label_1 
 _geom_angle_atom_site_label_2 
 _geom_angle_atom_site_label_3 
 _geom_angle 
 _geom_angle_site_symmetry_1 
 _geom_angle_site_symmetry_3 
 _geom_angle_publ_flag 
C10 Ni1 C11 87.51(10) . . ? 
C10 Ni1 N1 172.49(9) . . ? 
C11 Ni1 N1 89.47(9) . . ? 
C10 Ni1 N6 95.93(9) . . ? 
C11 Ni1 N6 175.93(9) . . ? 
N1 Ni1 N6 87.38(8) . . ? 
C10 Ni1 N4 96.05(9) . . ? 
C11 Ni1 N4 90.38(9) . . ? 
N1 Ni1 N4 90.84(8) . . ? 
N6 Ni1 N4 87.10(7) . . ? 
C10 Ni1 N7 86.64(8) . . ? 
C11 Ni1 N7 95.90(9) . . ? 
N1 Ni1 N7 86.84(8) . . ? 
N6 Ni1 N7 86.50(8) . . ? 
N4 Ni1 N7 173.28(8) . . ? 
C1 N1 N2 107.32(19) . . ? 
C1 N1 Ni1 133.40(16) . . ? 
N2 N1 Ni1 119.27(15) . . ? 
C3 N2 N1 109.26(19) . . ? 
C3 N2 B1 131.3(2) . . ? 
N1 N2 B1 118.97(18) . . ? 
C4 N3 N4 109.35(19) . . ? 
C4 N3 B1 131.2(2) . . ? 
N4 N3 B1 119.37(18) . . ? 
C6 N4 N3 106.85(19) . . ? 
C6 N4 Ni1 136.79(17) . . ? 
N3 N4 Ni1 116.36(14) . . ? 
C7 N5 N6 109.42(17) . . ? 
C7 N5 B1 130.14(19) . . ? 
N6 N5 B1 120.33(17) . . ? 
C9 N6 N5 106.37(17) . . ? 
C9 N6 Ni1 136.34(15) . . ? 
N5 N6 Ni1 117.06(13) . . ? 
C12 N7 Ni1 171.0(2) . . ? 
N1 C1 C2 109.5(2) . . ? 
N1 C1 H1 125.2 . . ? 
C2 C1 H1 125.2 . . ? 
C3 C2 C1 105.5(2) . . ? 
C3 C2 H2 127.3 . . ? 
C1 C2 H2 127.3 . . ? 
N2 C3 C2 108.4(2) . . ? 
N2 C3 H3 125.8 . . ? 
C2 C3 H3 125.8 . . ? 
N3 C4 C5 108.3(2) . . ? 
N3 C4 H4 125.8 . . ? 
C5 C4 H4 125.8 . . ? 
C4 C5 C6 105.3(2) . . ? 
C4 C5 H5 127.4 . . ? 
C6 C5 H5 127.4 . . ? 
N4 C6 C5 110.2(2) . . ? 
N4 C6 H6 124.9 . . ? 
C5 C6 H6 124.9 . . ? 
N5 C7 C8 108.76(19) . . ? 
N5 C7 H7 125.6 . . ? 
C8 C7 H7 125.6 . . ? 
C7 C8 C9 104.7(2) . . ? 
C7 C8 H8 127.6 . . ? 
C9 C8 H8 127.6 . . ? 
N6 C9 C8 110.7(2) . . ? 
N6 C9 H9 124.6 . . ? 
C8 C9 H9 124.6 . . ? 
F2 C10 F3 104.47(18) . . ? 
F2 C10 F1 104.13(19) . . ? 
F3 C10 F1 104.43(18) . . ? 
F2 C10 Ni1 111.77(15) . . ? 
F3 C10 Ni1 114.49(17) . . ? 
F1 C10 Ni1 116.33(16) . . ? 
F5 C11 F6 105.83(18) . . ? 
F5 C11 F4 105.10(19) . . ? 
F6 C11 F4 103.81(18) . . ? 
F5 C11 Ni1 111.63(16) . . ? 
F6 C11 Ni1 118.36(17) . . ? 
F4 C11 Ni1 111.04(14) . . ? 
N7 C12 C13 179.3(3) . . ? 
C12 C13 H13A 109.5 . . ? 
C12 C13 H13B 109.5 . . ? 
H13A C13 H13B 109.5 . . ? 
C12 C13 H13C 109.5 . . ? 
H13A C13 H13C 109.5 . . ? 
H13B C13 H13C 109.5 . . ? 
N3 B1 N5 107.74(18) . . ? 
N3 B1 N2 109.13(19) . . ? 
N5 B1 N2 107.16(17) . . ? 
N3 B1 H1A 113.1(16) . . ? 
N5 B1 H1A 109.4(15) . . ? 
N2 B1 H1A 110.1(15) . . ? 
  
loop_ 
 _geom_torsion_atom_site_label_1 
 _geom_torsion_atom_site_label_2 
 _geom_torsion_atom_site_label_3 
 _geom_torsion_atom_site_label_4 
 _geom_torsion 
 _geom_torsion_site_symmetry_1 
 _geom_torsion_site_symmetry_2 
 _geom_torsion_site_symmetry_3 
 _geom_torsion_site_symmetry_4 
 _geom_torsion_publ_flag 
C11 Ni1 N1 C1 -53.7(2) . . . . ? 
N6 Ni1 N1 C1 128.9(2) . . . . ? 
N4 Ni1 N1 C1 -144.0(2) . . . . ? 
N7 Ni1 N1 C1 42.3(2) . . . . ? 
C11 Ni1 N1 N2 127.76(17) . . . . ? 
N6 Ni1 N1 N2 -49.66(16) . . . . ? 
N4 Ni1 N1 N2 37.39(16) . . . . ? 
N7 Ni1 N1 N2 -136.30(17) . . . . ? 
C1 N1 N2 C3 0.6(3) . . . . ? 
Ni1 N1 N2 C3 179.49(15) . . . . ? 
C1 N1 N2 B1 -172.26(19) . . . . ? 
Ni1 N1 N2 B1 6.6(3) . . . . ? 
C4 N3 N4 C6 0.5(3) . . . . ? 
B1 N3 N4 C6 176.8(2) . . . . ? 
C4 N3 N4 Ni1 -179.03(15) . . . . ? 
B1 N3 N4 Ni1 -2.7(2) . . . . ? 
C10 Ni1 N4 C6 -36.0(3) . . . . ? 
C11 Ni1 N4 C6 51.5(2) . . . . ? 
N1 Ni1 N4 C6 141.0(2) . . . . ? 
N6 Ni1 N4 C6 -131.7(2) . . . . ? 
C10 Ni1 N4 N3 143.25(16) . . . . ? 
C11 Ni1 N4 N3 -129.22(17) . . . . ? 
N1 Ni1 N4 N3 -39.75(15) . . . . ? 
N6 Ni1 N4 N3 47.59(16) . . . . ? 
C7 N5 N6 C9 -0.5(2) . . . . ? 
B1 N5 N6 C9 176.10(19) . . . . ? 
C7 N5 N6 Ni1 -175.87(14) . . . . ? 
B1 N5 N6 Ni1 0.7(2) . . . . ? 
C10 Ni1 N6 C9 44.8(2) . . . . ? 
N1 Ni1 N6 C9 -128.4(2) . . . . ? 
N4 Ni1 N6 C9 140.6(2) . . . . ? 
N7 Ni1 N6 C9 -41.4(2) . . . . ? 
C10 Ni1 N6 N5 -141.58(16) . . . . ? 
N1 Ni1 N6 N5 45.18(15) . . . . ? 
N4 Ni1 N6 N5 -45.79(15) . . . . ? 
N7 Ni1 N6 N5 132.17(15) . . . . ? 
N2 N1 C1 C2 -0.9(3) . . . . ? 
Ni1 N1 C1 C2 -179.61(17) . . . . ? 
N1 C1 C2 C3 0.9(3) . . . . ? 
N1 N2 C3 C2 0.0(3) . . . . ? 
B1 N2 C3 C2 171.6(2) . . . . ? 
C1 C2 C3 N2 -0.5(3) . . . . ? 
N4 N3 C4 C5 -0.2(3) . . . . ? 
B1 N3 C4 C5 -176.0(2) . . . . ? 
N3 C4 C5 C6 -0.2(3) . . . . ? 
N3 N4 C6 C5 -0.6(3) . . . . ? 
Ni1 N4 C6 C5 178.74(18) . . . . ? 
C4 C5 C6 N4 0.5(3) . . . . ? 
N6 N5 C7 C8 0.6(3) . . . . ? 
B1 N5 C7 C8 -175.5(2) . . . . ? 
N5 C7 C8 C9 -0.5(3) . . . . ? 
N5 N6 C9 C8 0.2(3) . . . . ? 
Ni1 N6 C9 C8 174.24(18) . . . . ? 
C7 C8 C9 N6 0.2(3) . . . . ? 
C11 Ni1 C10 F2 168.36(17) . . . . ? 
N6 Ni1 C10 F2 -13.83(17) . . . . ? 
N4 Ni1 C10 F2 -101.53(16) . . . . ? 
N7 Ni1 C10 F2 72.30(16) . . . . ? 
C11 Ni1 C10 F3 49.83(17) . . . . ? 
N6 Ni1 C10 F3 -132.36(16) . . . . ? 
N4 Ni1 C10 F3 139.95(17) . . . . ? 
N7 Ni1 C10 F3 -46.23(16) . . . . ? 
C11 Ni1 C10 F1 -72.24(17) . . . . ? 
N6 Ni1 C10 F1 105.57(17) . . . . ? 
N4 Ni1 C10 F1 17.88(17) . . . . ? 
N7 Ni1 C10 F1 -168.30(18) . . . . ? 
C10 Ni1 C11 F5 -95.17(17) . . . . ? 
N1 Ni1 C11 F5 77.95(16) . . . . ? 
N4 Ni1 C11 F5 168.79(16) . . . . ? 
N7 Ni1 C11 F5 -8.81(17) . . . . ? 
C10 Ni1 C11 F6 28.02(18) . . . . ? 
N1 Ni1 C11 F6 -158.86(17) . . . . ? 
N4 Ni1 C11 F6 -68.02(17) . . . . ? 
N7 Ni1 C11 F6 114.38(17) . . . . ? 
C10 Ni1 C11 F4 147.90(18) . . . . ? 
N1 Ni1 C11 F4 -38.97(17) . . . . ? 
N4 Ni1 C11 F4 51.86(17) . . . . ? 
N7 Ni1 C11 F4 -125.74(17) . . . . ? 
C4 N3 B1 N5 118.5(3) . . . . ? 
N4 N3 B1 N5 -57.0(3) . . . . ? 
C4 N3 B1 N2 -125.5(3) . . . . ? 
N4 N3 B1 N2 59.0(2) . . . . ? 
C7 N5 B1 N3 -124.3(2) . . . . ? 
N6 N5 B1 N3 59.9(2) . . . . ? 
C7 N5 B1 N2 118.4(2) . . . . ? 
N6 N5 B1 N2 -57.4(3) . . . . ? 
C3 N2 B1 N3 125.8(2) . . . . ? 
N1 N2 B1 N3 -63.2(2) . . . . ? 
C3 N2 B1 N5 -117.8(2) . . . . ? 
N1 N2 B1 N5 53.2(3) . . . . ? 
  
_diffrn_measured_fraction_theta_max    1.000 
_diffrn_reflns_theta_full              68.23 
_diffrn_measured_fraction_theta_full   1.000 
_refine_diff_density_max    0.260 
_refine_diff_density_min   -0.240 
_refine_diff_density_rms    0.055 
